# Supplementary material for: Case Report: Common variable immunodeficiency phenotype and granulomatous–lymphocytic interstitial lung disease with a novel SOCS1 variant
Source: PubMed Central journal article supplement (PMC11239428; doi:10.3389/fped.2024.1423858), 2024-06-28
Supplement: Datasheet1.pdf [file Datasheet1.pdf]

**Supplemental Table 1: Laboratory findings**

|                               |                                            | <b>Mother<br/>(56 y)</b> | <b>Normal Range</b> |
|-------------------------------|--------------------------------------------|--------------------------|---------------------|
| <b>Initial results</b>        | <b>Hemoglobin</b> (g/dl)                   | 14.7                     | 11.5-15.5           |
|                               | <b>Hematocrit</b> (%)                      | 44.4                     | 31.0-45.0           |
|                               | <b>WBC</b> (cells/mm <sup>3</sup> )        | <b>4300</b>              | 4500-13500          |
|                               | <b>Neutrophils</b> % (mm <sup>3</sup> )    | 49 (2107)                | 32-54               |
|                               | <b>Lymphocytes</b> % (mm <sup>3</sup> )    | 39 (1677)                | 28-48               |
|                               | <b>Monocytes</b> (%)                       | 5                        | 3-6                 |
|                               | <b>Platelets</b> (10 <sup>3</sup> /μL)     | 219                      | 150-450             |
|                               | <b>IgG</b> (mg/dl)                         | <b>728</b>               | 951-1421            |
|                               | <b>IgA</b> (mg/dl)                         | <b>479</b>               | 87-239              |
|                               | <b>IgM</b> (mg/dl)                         | 131                      | 68-182              |
|                               | <b>IgE</b> (UI/ml)                         | ND                       | ≤ 90                |
|                               | <b>C3/ C4</b> (mg/dl)                      | 122 / 24                 | 90-150/15-35        |
| <b>Tetanus Toxoid</b> (UI/ml) | 0.86                                       |                          |                     |
| <b>Autoantibodies</b>         | (+)* 1/160 (Fine speckled)<br>(-)#         |                          |                     |
| <b>Cellular response</b>      | <b>CD3</b> % (mm <sup>3</sup> )            | 79 (1325)                | 55-83               |
|                               | <b>CD4</b> % (mm <sup>3</sup> )            | 54 (906)                 | 28-57               |
|                               | <b>CD8</b> % (mm <sup>3</sup> )            | 24 (402)                 | 19-34               |
|                               | <b>CD19</b> % (mm <sup>3</sup> )           | 16.2 (272)               | 10-31               |
|                               | <b>CD56</b> % (mm <sup>3</sup> )           | <b>3.6 (69)</b>          | 4-26                |
|                               | <b>Naïve CD4<sup>+</sup> %</b>             | <b>24.9</b>              | 34.8-70.3           |
|                               | <b>Central memory CD4<sup>+</sup> %</b>    | <b>59.3</b>              | 24.3-42.7           |
|                               | <b>Effector memory CD4<sup>+</sup> %</b>   | <b>15.5</b>              | 2.1-7.4             |
|                               | <b>Terminal Effector CD4<sup>+</sup> %</b> | <b>0.3</b>               | 2.0-7.2             |
|                               | <b>HLA-DR CD4<sup>+</sup> %</b>            | <b>22.6</b>              | 0.8-2.2             |
|                               | <b>Naïve CD8<sup>+</sup> %</b>             | <b>11.6</b>              | 48.6-87.5           |
|                               | <b>Central memory CD8<sup>+</sup> %</b>    | 34.2                     | 9.8-37.6            |
|                               | <b>Effector memory CD8<sup>+</sup> %</b>   | <b>23.6</b>              | 0.2-6.9             |
|                               | <b>Terminal Effector CD8<sup>+</sup> %</b> | <b>26.6</b>              | 0.8-14.0            |
|                               | <b>HLA-DR CD8<sup>+</sup> %</b>            | <b>71.1</b>              | 1.2-8.1             |
|                               | <b>Naïve CD19<sup>+</sup> %</b>            | 46.1                     |                     |
|                               | <b>IgM memory B cells %</b>                | <b>19.7</b>              | 10.0-16.8           |
|                               | <b>Switched Memory %</b>                   | <b>30.7</b>              | 14.0-20.6           |
| <b>Transitional B cells %</b> | 0.8                                        | 2.3-4.0                  |                     |
| <b>CD21<sup>low</sup> %</b>   | <b>9.7</b>                                 | < 9.0                    |                     |
| <b>Plasmablast Cells %</b>    | 0.4                                        | 0.1-0.2                  |                     |

Abbreviations: \*anti-nuclear antibodies, # tested autoantibodies: anti-mitochondrial, anti-parietal cell, anti-smooth muscle, anti-transglutaminase, liver-kidney microsome.

Note: Bold numbers represent abnormal values for age matched donors. \*Under IVIG treatment; ND, *not done*; **T cells (gated on CD3<sup>+</sup> CD4<sup>+</sup> or CD3<sup>+</sup>CD8<sup>+</sup> cells):** Naïve T cells (CD45RA<sup>+</sup>CD27<sup>+</sup>); Central memory T cells (CD45RA<sup>-</sup>CD27<sup>+</sup>); Effector memory T cells (CD45RA<sup>-</sup>CD27<sup>-</sup>); Terminal effector T cells (CD45RA<sup>+</sup>CD27<sup>-</sup>); Th1 memory (CD45RA<sup>-</sup>CXCR3<sup>+</sup> CCR6<sup>-</sup>); Th2 memory (CD45RA<sup>-</sup>CXCR3<sup>-</sup> CCR6<sup>+</sup>); Th17 memory (CD45RA<sup>-</sup>CXCR3<sup>-</sup> CCR6<sup>+</sup>); **B cells (gated on CD19<sup>+</sup> cells):** Naïve B cells (IgM<sup>+</sup>IgD<sup>+</sup>CD27<sup>-</sup>); IgM memory B cells (IgM<sup>+</sup>IgD<sup>+</sup> CD27<sup>+</sup>); Switched Memory (IgD<sup>-</sup>IgM<sup>+</sup>CD38<sup>+/+</sup>); Transitional B cells (CD38<sup>++</sup>CD24<sup>++</sup>); CD21<sup>low</sup> B cells (CD21<sup>low</sup>CD38<sup>+/+</sup>); Plasmablasts (CD38<sup>++</sup>CD27<sup>++</sup>).
