# Supplementary material for: Case Report: Common variable immunodeficiency phenotype and granulomatous–lymphocytic interstitial lung disease with a novel SOCS1 variant
Source: PubMed Central journal article supplement (PMC11239428; doi:10.3389/fped.2024.1423858), 2024-06-28
Supplement: Datasheet2.pdf [file Datasheet2.pdf]

## Supplementary Appendix S1

Whole exome sequencing was performed using the Agilent SureSelect Human Exon Sequence Capture Kit XT v7. Sequencing libraries were prepared, followed by sequencing on the Illumina platform (Macrogen). Bioinformatic analysis was conducted following the Genome Analysis Toolkit (GATK) Best Practices Workflows. A total of 106,987 variants were obtained. Variants in genes associated with inborn errors of immunity, clinically overlapping with the proband, were prioritized:

**IEI genes:** ACD, ACP5, ACTB, ADA, ADAM17, ADAR, AICDA, AIRE, AK2, ALPI, AP3B1, ARHGEFI, ARPCIB, ATM, ATP6AP1, BACH2, BCLIO, BCL11B, BLM, BLK, BLNK, BTK, C17ORF62, CIQA, CIQB, CIQC, CIS, C2, C3, CARD11, CARD14, CARD9, CASPIO, CASP8, CD19, CD247, CD27, CD3D, CD3E, CD3G, CD40, CD40LG, CD46, CD55, CD59, CD70, CD79A, CD79B, 081, CD8A, CDCA7, CDK9, CEBPE, CECRI, CFB, CFD, CFH, CFI, CFP, CFTR, CHD7, CIITA, CLCN7, CLPB, CDLECII, COPA, ROIA, CR2, CSF2RA, CSF2RB, CSF3R, CTCI, CTLA4, CTPSI, CTSC, CXCR4, CYBA, CYBB, DBRI, DCLREIC, DDX58, GKE, DKCI, DNAJC21, DNASE2, DNMT3B, DOCK2, DOCK8, EFLI, ELANE, EPG5, ERCC6L2, EXTL3, FADD, FAS, FASLG, FCHOI, FERMT3, FOXNI, FOXP3, G6PC3, G6PD, GATA2, GFII, GINSI, HELIS, HYOU1, ICOS, IFIHI, IFNAR2, IFNGRI, IFNGR2, IGLLI, IKBKB, IKZF1, 1110, ILIORA, ILIORB, IL12B, IL12RB1, IL17RA, IL17RC, ILIRN, IL21, IL21R, IL23R, IL2RA, IL2RB, IL2RG, IL36RN, IL6ST, IL7R, IRAK4, IRF2BP2, IRFB, ISG15, ITGB2, ITK, JAGNI, JAK1, JAK3, KRAS, LAMTOR2, LAT, LCK, LIG1, LIG4, LPIN2, LRBA, LYST, MAGTI, MALTI, MAP3K14, MASPI, MEFV, MKLI, MOGS, MREIIA, MSN, MS4A1 (CD20), MTHFDI, MVK, MYD88, MYO5A, NBN, NCF1, NCF2, NCF4, NCSTN, NFKBI, NFKB2, NFKBIA, NHEJ1, NHP2, NLRC4, NLRPI, NLRP12, NLRP3, NOD2, NOMO, NRAS, NSMCE3, OFDI, ORAI1, OTULIN, PARN, PEPD, PGM3, PIGA, PIK3CD, PIK3R1, PLCG2, PMS2, PNP, POLD1, POLE, POLE2, POMP, PRFI, PRG4, PRKCD, PRKDC, PSENEN, PSMB8, PSTPIPI, PTPRC, RAB27A, RAC2, RAG1, RAG2, RASGRP1, RBCK1, RECQL4, RELA, RFX5, RFXANK, RFXAP, RHOH, RIPK1, RLTPR, RMRP, RNASEH2A, RNASEH2B, RNASEH2C, RNF168, RNF31, RNU4ATAC, RORC, RPSA, RTEL1, SAMD9, SAMD9L, SAMHDI, SBDS, SERPING1, SH2DIA, SLC29A3, SLC35C1, SLC37A4, SLC39A7, SLC46A1, SLC7A7, SMARCAL1, SMARCD2, SPIO, SPINK5, SPPL2A, SRP54, SRP72, STAT1, STAT2, STAT3, STAT5B, STIMI, STK4, STXII, STXBP2, TAPI, TAP2, TAPBP, TBXI, TCF3, TCN2, TERC, TERT, TFRC, TGFBI, THBD, TIN2, TMC6, TMC8, TMEM173, TNFAIP3, TNFRSF13B, TNFRSF13C, TNFRSF1A, TNFRSF4, TNFRSF9, TNFRSF12, TNFRSF7, TRAF3IP2, TREX1, TRNT1, TTC37, TTC7A, TYK2, UNC119, UNC13D, UNC93B1, UNG, USBI, USPIB, VAV1, VPS13B, VPS45, WAS, WDRI, WIPF1, WRAP53, XIAP, ZAP70, ZBTB24, ZNF341.

**PIRD genes :** ABCBI, ACP5, ADA2, ADAM17, ADAR, ADGRE2, AIRE, ANXAII, AP3B1, AP3D1, APOLI, ARID5B, ARPCIB, ATG16L1, ATG5, BANK1, BLK, BTNL2, CIQA, CIQB, CIQC, CIQTNF4, CIR, CIS, C2, C3, C4A, C4B, CALCOC2, CARD14, CARD9, CARMIL2, CASPIO, CASP8, CCDC88B, CCL2, CCL22, CCRI, CCR3, CCR5, CCR9, CD14, CD226, CD27, CD40, CD46, CD55, CD70, CFB, CFH, CFHRI, CFHR2, CFHR3, CFHR4, CFHR5, CFI, CIITA, CLEC16A, CR2, CSK, CTLA4, CTPSI, CXCL13, CXCR5, CYBB, DDX58, DGATI, DNASE1, DNASE1L3, DNMT3A, DOCK8, E2F1, EGFR, EPCAM, ERAPI, ETSI, FAAP24, FADD, FAS, FASLG, FCGR2A, FCGR2B, FOXP3, FUT2, GUCY2C, HAS2, HNF1A, ICAMI, ICOS, IFIHI, IKZF1, IKZF3, 1110, ILIORA, ILIORB, IL12A, IL12B, IL12RB1, IL12RB2, 1115, IL15RA, IL18R1, ILIRN, IL23A, IL23R, IL2RA, IL36RN, IL7R, IRAK1, IRFI, IRF2BP2, IRF5, IRF7, IRF8, IRGM, ISG15, ITCH, ITGAM, ITK, KIRREL2, KLRC4, KRAS, LACCI, LAT, LCK, LIMK2, LPIN2, LRBA, LYST, MAGTI, MAN2B1, MASP2, MBL2, MC2R, MCM4, MECP2, MEFV, MICA, MICB, MME, MRAP, MSTI, MTHFR, MTMR3, MVK, MYH9, MYO5A, MYO5B, NCF1, NCF2, NEILI, NEUROG3, NFAT5, NFKBI,

NFKBIA, NLRC4, NLRP12, NLRP3, NOD2, NPHSI, NROBI, NR4A2, NRAS, OASI, OAS2, OTULIN, PBXI, PDCDI, PDGFRA, PEPD, PLA2R1, PLCG2, PRDMI, PRFI, PRKCD, PRKGI, PSMB8, PSTPIPI, PTEN, PTGS2, PTPN2, PTPN22, PTPRC, P XK, RAB27A, RAG2, RASGRP1, RBCKI, RECQL4, REL, RNASEH2A, RNASEH2B, RNASEH2C, SAAI, SAMHDI, SATBI, SH2DIA, SKIV2L, SLC26A3, SLC7A7, SLC9A3, SPATA5, **SOCS1**, SPINT2, STAT1, STAT3, STAT4, STAT5B, STAT6, STK4, STXII, STXBP2, TAGAP, TAPI, TBX21, TCF7, TGFBI, THBD, THBSI, THSD7A, TLR5, TLR7, TLR8, TLR9, TMEM173, TNF, TNFAIP3, TNFRSF1A, TNFRSF13B, TNFRSF1A, TNFRSF4, TNFSF15, TNFSF4, TNIPI, TREXI, TRIM21, TRNTI, TTC37, TTC7A, TYK2, UBAC2, UBE2L3, UHRFIBPI, UNC13D, WDRI, XIAP, XKR6, ZAP70.

**Additional genes:** PRRC2A, LILRB5, PSMB9, TNIPI, ARID3A, INPP5D, SH3BP2, BANK1, GAB2, CAMLG, BCL2L11, EBFI, MAGT1, RAG2, SMARCAL1, IVNSIABP, PTPN2.

**Supplementary S2**

|                               | Mother<br>(8 y)                                              | Normal Range    |              |
|-------------------------------|--------------------------------------------------------------|-----------------|--------------|
| <b>Initial results</b>        | <b>Hemoglobin</b> (g/dl)                                     | 12.3            | 11.5-15.5    |
|                               | <b>Hematocrit</b> (%)                                        | 39.0            | 31.0-45.0    |
|                               | <b>WBC</b> (cells/mm <sup>3</sup> )                          | <b>3,000</b>    | 4.5-13.5     |
|                               | <b>Neutrophils</b> % (mm <sup>3</sup> )                      | 27 (810)        | 32-54        |
|                               | <b>Lymphocytes</b> % (mm <sup>3</sup> )                      | 65 (1950)       | 28-48        |
|                               | <b>Monocytes</b> (%)                                         | 5               | 3-6          |
|                               | <b>Platelets</b> (10 <sup>3</sup> /μL)                       | <b>69</b>       | 150-450      |
|                               | <b>AST/ALT</b> (UI/L)                                        | <b>84 / 125</b> | ≤ 40         |
|                               | <b>LDH</b> (UI/L)                                            | ND              | 120-300      |
|                               | <b>Total proteins</b> (g/dl)                                 | 6.6             | 6.0-8.0      |
|                               | <b>Albumin</b> (g/dl)                                        | 4.6             | 3.8-5.4      |
|                               | <b>IgG</b> (mg/dl)                                           | <b>370</b>      | 969-1485     |
|                               | <b>IgA</b> (mg/dl)                                           | <b>30</b>       | 87-239       |
|                               | <b>IgM</b> (mg/dl)                                           | <b>29</b>       | 68-182       |
|                               | <b>IgE</b> (UI/ml)                                           | ND              | ≤ 90         |
|                               | <b>C3/ C4</b> (mg/dl)                                        | 103 / 12        | 90-150/15-35 |
| <b>Specific Ig antibodies</b> | <b>Measles (-)/ Mumps (-)<br/>Rubella (+)/ Varicella (+)</b> |                 |              |
| <b>Tetanus Toxoid</b> (UI/ml) | 0.18                                                         | >0.1            |              |
| <b>Pneumococcal</b> (mg/L)    | <30                                                          |                 |              |
| <b>Autoantibodies</b>         | (-)#                                                         |                 |              |
| <b>Isohemagglutinins</b>      | A (-) / B (1/64)                                             |                 |              |
| <b>Cellular response</b>      | <b>CD3</b> % (mm <sup>3</sup> )                              | 55-78           |              |
|                               | <b>CD4</b> % (mm <sup>3</sup> )                              | 27-53           |              |
|                               | <b>CD8</b> % (mm <sup>3</sup> )                              | 19-34           |              |
|                               | <b>CD19</b> % (mm <sup>3</sup> )                             | 10-31           |              |
|                               | <b>CD56</b> % (mm <sup>3</sup> )                             | 4-26            |              |
|                               | <b>TCR αβ</b> %                                              | 54-66           |              |
|                               | <b>TCR γδ</b> %                                              | 5-8             |              |
|                               | <b>DN TCR αβ CD3<sup>+</sup> cells</b> %                     | < 2.5           |              |
|                               | <b>Naïve CD4<sup>+</sup></b> %                               | 37.8-69.6       |              |
|                               | <b>Central memory CD4<sup>+</sup></b> %                      | 21.4-40.3       |              |
|                               | <b>Effector memory CD4<sup>+</sup></b> %                     | 1.5-9.7         |              |
|                               | <b>Terminal Effector CD4<sup>+</sup></b> %                   | 2.6-6.7         |              |
|                               | <b>HLA-DR CD4<sup>+</sup></b> %                              | 0.6-3.4         |              |
|                               | <b>Naïve CD8<sup>+</sup></b> %                               | 49.2-82.7       |              |
|                               | <b>Central memory CD8<sup>+</sup></b> %                      | 11.5-30.7       |              |
|                               | <b>Effector memory CD8<sup>+</sup></b> %                     | 0.7-7.5         |              |
|                               | <b>Terminal Effector CD8<sup>+</sup></b> %                   | 1.5-20.8        |              |
|                               | <b>HLA-DR CD8<sup>+</sup></b> %                              | 1.4-5.8         |              |
|                               | <b>Naïve CD19<sup>+</sup></b> %                              |                 |              |
| <b>IgM memory B cells</b> %   | 9.5-17.2                                                     |                 |              |
| <b>Switched Memory</b> %      | 5.5-14.9                                                     |                 |              |
| <b>Transitional B cells</b> % | 5.1-8.7                                                      |                 |              |
| <b>CD21<sup>low</sup></b> %   | 5.6-12.6                                                     |                 |              |

|  |                            |         |
|--|----------------------------|---------|
|  | <b>Plasmablast Cells %</b> | 0.1-0.8 |
|--|----------------------------|---------|
